# Supplementary material for: Quantum dot based multiplex fluorescence quenching immune chromatographic strips for the simultaneous determination of sulfonamide and fluoroquinolone residues in chicken samples
Source: Royal Society of Chemistry journal article supplement (doi:10.1039/c7ra01753g), 2017-01-01
Supplement: c7ra01753g1.pdf [file c7ra01753g1.pdf]

**1 Quantum dots based multiplex fluorescent quenching immune**  
**2 chromatographic strips for the simultaneous determination of**  
**3 sulfonamides and fluoroquinolones residues in chicken samples**

4 Gaoshuang Hu<sup>a</sup>, Wei Sheng<sup>a</sup>, Shijie Li<sup>a</sup>, Yan Zhang<sup>a</sup>, Junping Wang<sup>a</sup> and Shuo  
5 Wang<sup>a,b,\*</sup>

6

7 <sup>a</sup>Key Laboratory of Food Nutrition and Safety, Ministry of Education of  
8 China, Tianjin University of Science and Technology, Tianjin 300457, China.

9 <sup>b</sup> Beijing Advanced Innovation Center for Food Nutrition and Human Health, Beijing  
10 Technology & Business University (BTBU), Beijing 100048, China

11

12 \*Corresponding author: Shuo Wang

13 Tel: +86 22 6091 2483;

14 Fax: +86 22 6091 2493

15 Email address: s.wang@tust.edu.cn

Table S1. The optimal conditions of the FQICS

| Factors                                                           | FQICS                       |
|-------------------------------------------------------------------|-----------------------------|
| NC membrane                                                       | Membrane of 135 s/4 cm      |
| Dilution solution and ratio of the OVA-QDs on C line              | PBS containing OVA; 1:8     |
| Dilution solution and ratio of the OVA-QDs on T1 line             | PBS containing SQX-OVA; 1:8 |
| Dilution solution and ratio of the OVA-QDs on T2 line             | PBS containing NOR-OVA; 1:8 |
| Dilution solution and ratio of coating antigen SQX-OVA on T1 line | PBS; 1:10                   |
| Dilution solution and ratio of coating antigen NOR-OVA on T2 line | PBS; 1:8                    |
| Dilution solution and ratio of gold labeled SQX McAb              | PBS; 1:50                   |
| Dilution solution and ratio of gold labeled NOR McAb              | PBS; 1:100                  |
